# Supplementary material for: Hydrophobic silver nanowire membrane for swabbing extraction and in situ SERS detection of polycyclic aromatic hydrocarbons on toys
Source: Royal Society of Chemistry journal article supplement (doi:10.1039/c7ay00489c), 2017-01-01
Supplement: c7ay00489c1.pdf [file c7ay00489c1.pdf]

## SUPPLEMENTARY DATA

### **Hydrophobic silver nanowire membrane for swabbing extraction and in-situ SERS detection of polycyclic aromatic hydrocarbons on toys**

Lanlan Xiao, Min Zhang, Zhen Liu, Weiwei Bian, Xiaoli Zhang and Jinhua Zhan\*.

#### **Table of contents**

- 1) **Table S1** The directives and opinions about PAHs of toys by different countries, regions and international organizations.
- 2) **Table S2** SERS and normal Raman bands of PTH with their assignments.
- 3) **Table S3** SERS and normal Raman bands of fluoranthene, anthracene and pyrene with their assignments. Wavenumbers in  $\text{cm}^{-1}$ .
- 4) **Table S4** The calculated EFs of PAHs.
- 5) **Fig.S1** UV–Vis spectrum of the prepared Ag nanowires.
- 6) **Fig.S2** XRD pattern of silver nanowires.
- 7) **Fig.S3** The elements on the Ag NMs and PTH-Ag NMs.
- 8) **Fig.S4** The XPS spectra of Ag NMs and PTH-Ag NMs.
- 9) **Fig.S5** SERS spectra of fluoranthene on the Ag NMs with different alkanethiol.
- 10) **Fig.S6** The influence of PTH concentration on Ag NMs for detecting fluoranthene ( $40.45 \mu\text{g}\cdot\text{cm}^{-2}$ )
- 11) **Fig.S7** Structures of PAHs in this work.
- 12) **Fig.S8** Qualitative analysis of anthracene and pyrene by swabbing from aluminium foil.
- 13) **Fig.S9** The reusability of the PTH-Ag NMs.
- 14) **Fig.S10** Qualitative analysis of three PAHs by swabbing from the plastic toy and rubber toy.
- 15) **Fig.S11** Quantitative analysis of pyrene by swabbing from the plastic toy.

**16) Fig.S12** Calibration curve of pyrene based on PTH-Ag NMs by swabbing from the plastic toy.

1) **Table S1** The directives and opinions about PAHs of toys by different countries, regions and international organizations.

|                                                     |                                                                                                                                                                                   |
|-----------------------------------------------------|-----------------------------------------------------------------------------------------------------------------------------------------------------------------------------------|
| Bundesinstitut für Risikobewertung, BfR             |                                                                                                                                                                                   |
| BfR Opinion Nr. 032/2010                            | Carcinogenic polycyclic aromatic hydrocarbons (PAHs) in consumer products to be regulated by the EU - risk assessment by BfR in the context of a restriction proposal under REACH |
| BfR Opinion No 051/2009                             | Polycyclic aromatic hydrocarbons (PAHs) in toys                                                                                                                                   |
| International Organization for Standardization, ISO |                                                                                                                                                                                   |
| ISO 8124-3:2010                                     | Safety of toys                                                                                                                                                                    |
| European Standard                                   |                                                                                                                                                                                   |
| EN 71-2                                             | Safety of toys                                                                                                                                                                    |

2) **Table S2** SERS and normal Raman bands of PTH with their assignments. Wavenumbers in  $\text{cm}^{-1}$ .

| SERS | Normal Raman bands | Assignment                   |
|------|--------------------|------------------------------|
| 367  | 370                | CCC bend, gauche             |
| 614  | 624                | C-S stretch, gauche          |
| 688  | 701                | C-S stretch, trans           |
| 775  | 783                | CH <sub>2</sub> rock, gauche |
| 888  | 894                | CH <sub>2</sub> rock, gauche |
| 1019 | 1026               | C-C stretch, trans           |
| 1082 | 1086               | C-C stretch, gauche          |
| 1446 | 1448               | C-C stretch, gauche          |

3) **Table S3** SERS and normal Raman bands of fluoranthene, anthracene and pyrene with their assignments. Wavenumbers in  $\text{cm}^{-1}$ .

| SERS         |            |        |             |                               |
|--------------|------------|--------|-------------|-------------------------------|
| fluoranthene | anthracene | pyrene | Raman bands | Assignment                    |
| 559          |            |        | 563         | skeletal stretch              |
|              |            | 591    | 591         | skeletal stretch              |
|              | 753        |        | 753         | stretch                       |
| 802          |            |        | 804         | C-H stretch                   |
|              |            | 1065   | 1065        | CH in-plane bend              |
| 1104         |            |        | 1115        | C-H in-plane deformation      |
|              |            | 1238   | 1244        | C-C stretch/C-H in-plane bend |
| 1270         |            |        | 1271        | C-H in-plane deformation      |
|              | 1402       |        | 1400        | CC stretch/ring stretch       |
|              |            | 1406   | 1406        | CC stretch/ring stretch       |
| 1423         |            |        | 1424        | C-C stretch                   |
| 1455         |            |        | 1457        | C-C stretch                   |
|              | 1557       |        | 1557        | C-C stretch                   |
|              |            | 1595   | 1598        | C-C stretch                   |
| 1608         |            |        | 1611        | C-C stretch                   |
|              |            | 1628   | 1628        | C-C stretch                   |

4) **Table S4** The calculated EFs of PAHs.

| Reagents      | fluoranthene       | anthracene         | pyrene             |
|---------------|--------------------|--------------------|--------------------|
| Calculated EF | $5.75 \times 10^3$ | $6.85 \times 10^3$ | $1.62 \times 10^4$ |

The enhancement factors (EFs) was calculated by following equation:

$$EF = \frac{I_{SERS}}{I_{Raman}} \times \frac{N_{Raman}}{N_{SERS}}$$

$$N_{SERS} = \frac{S_{laser}}{S_0} \cdot C_{sol} \cdot V_{sol}$$

$$N_{Raman} = S_{laser} \cdot H_{laser} \cdot C_{bulk}$$

$$= S_{laser} \cdot H_{laser} \cdot \frac{m_{bulk}/M_{bulk}}{V_{bulk}} = \frac{S_{laser} \cdot H_{laser}}{M_{bulk}} \cdot \rho_{bulk}$$

$$EF = \frac{I_{SERS}}{I_{Raman}} \times \frac{S_{laser} \cdot H_{laser} \cdot \rho_{bulk}/M_{bulk}}{S_{laser} \cdot C_{sol} \cdot V_{sol}/S_0} = \frac{I_{SERS}}{I_{Raman}} \times \frac{H_{laser} \cdot \rho_{bulk} \cdot S_0}{C_{sol} \cdot V_{sol} \cdot M_{bulk}}$$

$$= 1.1 \times 10^4 \cdot \frac{I_{SERS} \cdot \rho_{bulk}}{I_{Raman} \cdot C_{sol} \cdot M_{bulk}}$$

$S_{laser}$  is the effective area of laser spot;

$S_0$  is the area of the PTH-Ag NMs, 1 cm×1 cm;

$H_{laser}$  is the effective depth of the scattering laser spot volume and here was estimated as 0.22 cm;

$C_{sol}$  is the concentration of the measured solution, mol·L<sup>-1</sup>.

$V_{sol}$  is the volume of the measured solution, 20 μL;

$m_{bulk}$  is the mass of pure reagents used to measure non-enhanced Raman intensity;

$M_{bulk}$  is the molar mass of pure reagents used to measure non-enhanced Raman intensity, g·mol<sup>-1</sup>;

$V_{bulk}$  is the volume of the measured pure reagents;

$\rho_{bulk}$  is the density of the measured pure reagents.

5) **Fig.S1** UV–Vis spectrum of the prepared Ag nanowires.

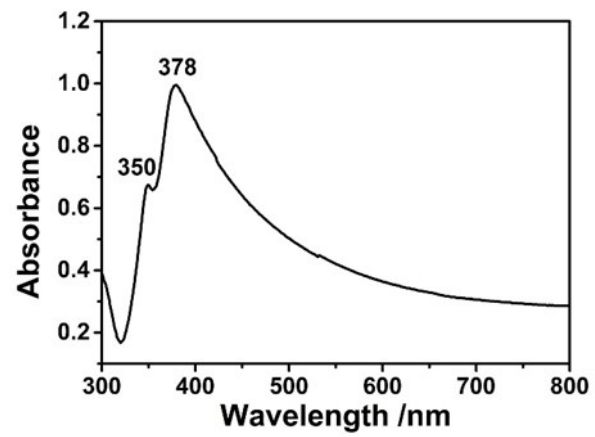

**Fig.S1** UV–Vis spectrum of the prepared Ag nanowires.

6) Fig.S2 XRD pattern of silver nanowires.

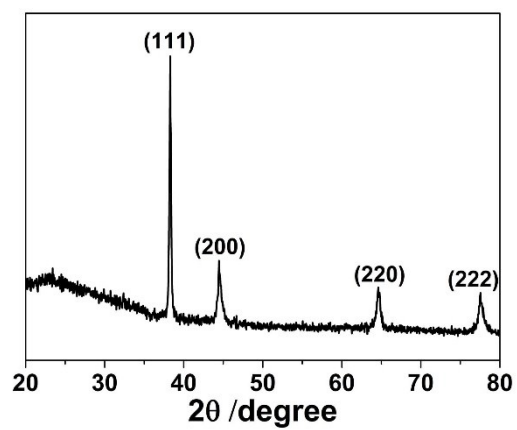

Fig.S2 XRD pattern of silver nanowires.



7) **Fig.S3** The elements on the Ag NMs and PTH-Ag NMs.

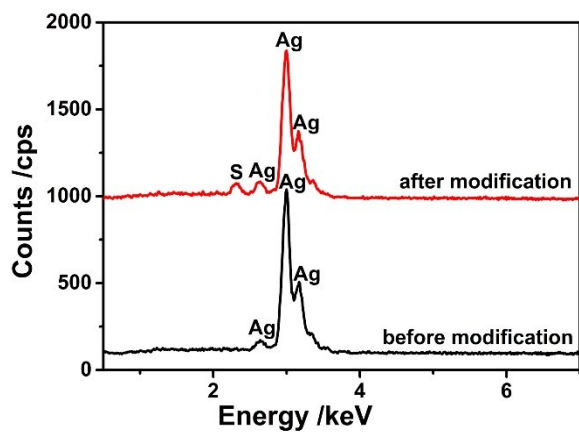

**Fig.S3** The elements on the silver nanowire membrane before (red line) and after (black line) the PTH treatment.

8) Fig.S4 The XPS spectra of Ag NMs and PTH-Ag NMs.

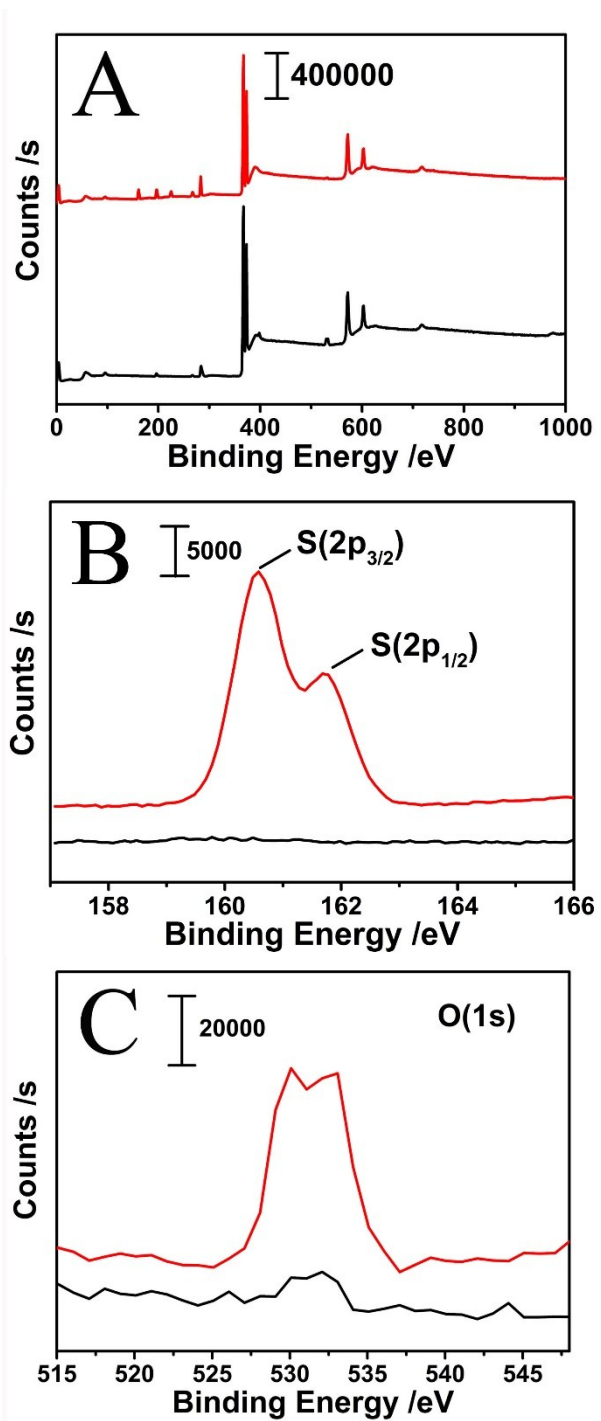

**Fig.S4** (A) The XPS spectra of the silver nanowire membrane without (black) and with (red) PTH treatment. (B) XPS spectra of the S (2p) scan of the membrane before (black) and after (red) modification with PTH. (C) XPS spectra of the O (1s) scan of the membrane before (black) and after (red) modification with PTH.

9) Fig.S5 SERS spectra of fluoranthene on the Ag NMs with different alkanethiol.

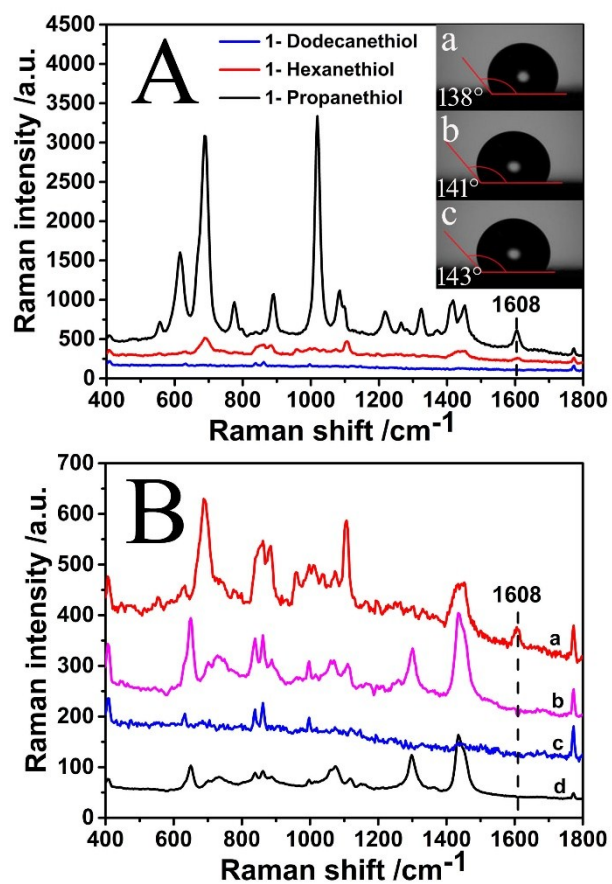

**Fig.S5** (A) SERS spectra of fluoranthene ( $40.45 \mu\text{g}\cdot\text{cm}^{-2}$ ) on the Ag NMs with different alkanethiol. The inset shows the static water contact angles of the (a)  $10^{-2}$  M PTH-Ag NMs, (b)  $10^{-2}$  M 1-hexanethiol-Ag NMs and (c)  $10^{-2}$  M 1-dodecanethiol-Ag NMs. (B) The amplified SERS spectra of (a)  $10^{-2}$  M 1-hexanethiol-Ag NMs and (c)  $10^{-2}$  M 1-dodecanethiol-Ag NMs, and the Raman spectrum of (b) liquid 1-hexanethiol and (d) liquid 1-dodecanethiol.

10) **Fig.S6** The influence of PTH concentration on Ag NMs for detecting fluoranthene ( $40.45 \mu\text{g}\cdot\text{cm}^{-2}$ )

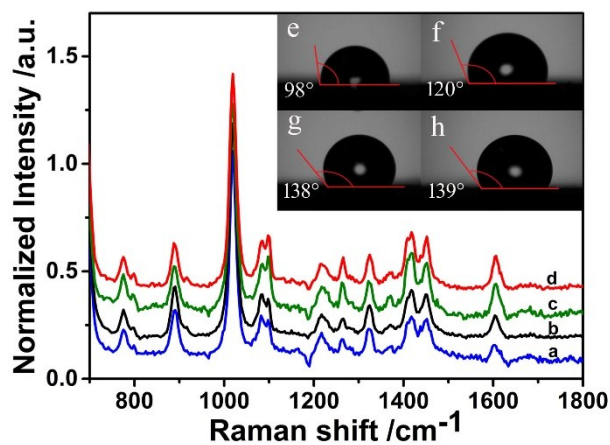

**Fig.S6** (A) SERS spectra of fluoranthene ( $40.45 \mu\text{g}\cdot\text{cm}^{-2}$ ) on the PTH-Ag NMs with various concentration of PTH solution (a)  $10^{-4}$  M, (b)  $10^{-3}$  M, (c)  $10^{-2}$  M and (d)  $10^{-1}$  M. (B) The inset shows the static water contact angles of (e)  $10^{-4}$  M PTH-Ag NMs, (f)  $10^{-3}$  M PTH-Ag NMs, (g)  $10^{-2}$  M PTH-Ag NMs, (h)  $10^{-1}$  M PTH-Ag NMs.

11) **Fig.S7** Structures of PAHs in this work.

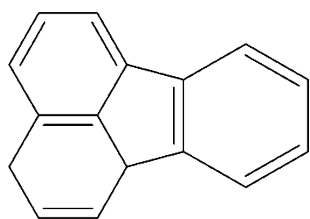

Fluoranthene

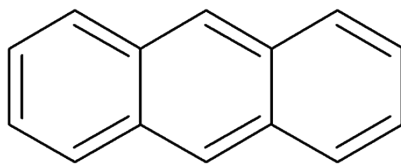

Anthracene

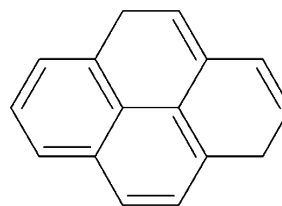

Pyrene

12) **Fig.S8** Qualitative analysis of anthracene and pyrene by swabbing from aluminum foil.

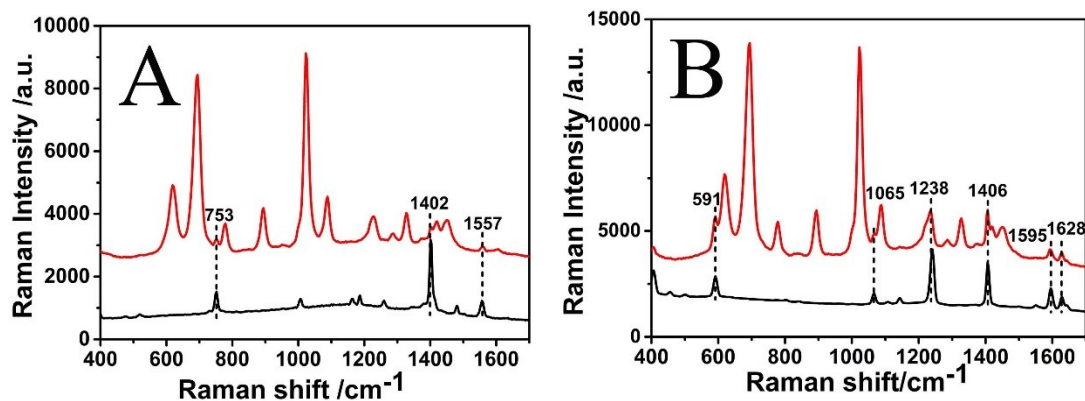

**Fig.S8** (A) SERS spectrum of 3.56  $\mu\text{g}\cdot\text{cm}^{-2}$  anthracene detected by PTH-Ag NMs (red line) and Raman spectrum of anthracene (black line). (B) SERS spectrum of 4.05  $\mu\text{g}\cdot\text{cm}^{-2}$  pyrene detected by PTH-Ag NMs (red line) and Raman spectrum of pyrene (black line).

13) Fig.S9 The reusability of the PTH-Ag NMs.

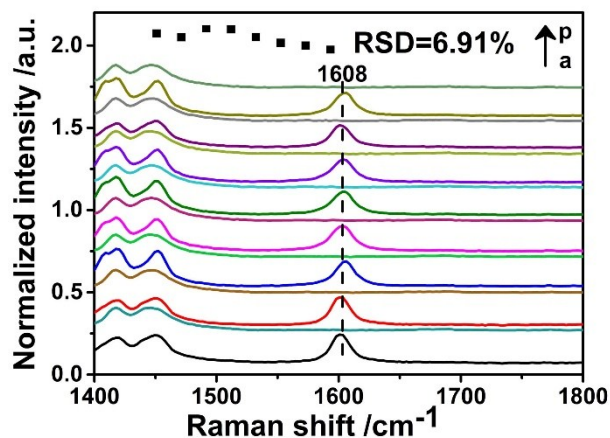

**Fig.S9** The reusability of the PTH-Ag NMs. Normalized SERS intensity of fluoranthene ( $4.04 \mu\text{g}\cdot\text{cm}^{-2}$ ) on the Ag nanowire membrane was recorded. (a), (c), (e), (g), (i), (k), (m), (o) was SERS intensity after the 1-8 cycles of swabbing process, respectively. (b), (d), (f), (h), (j), (l), (n), (p) was SERS intensity after the 1-8 cycles of elution process, respectively.

14) **Fig.S10** Qualitative analysis of three PAHs by swabbing from plastic toy and rubber toy.

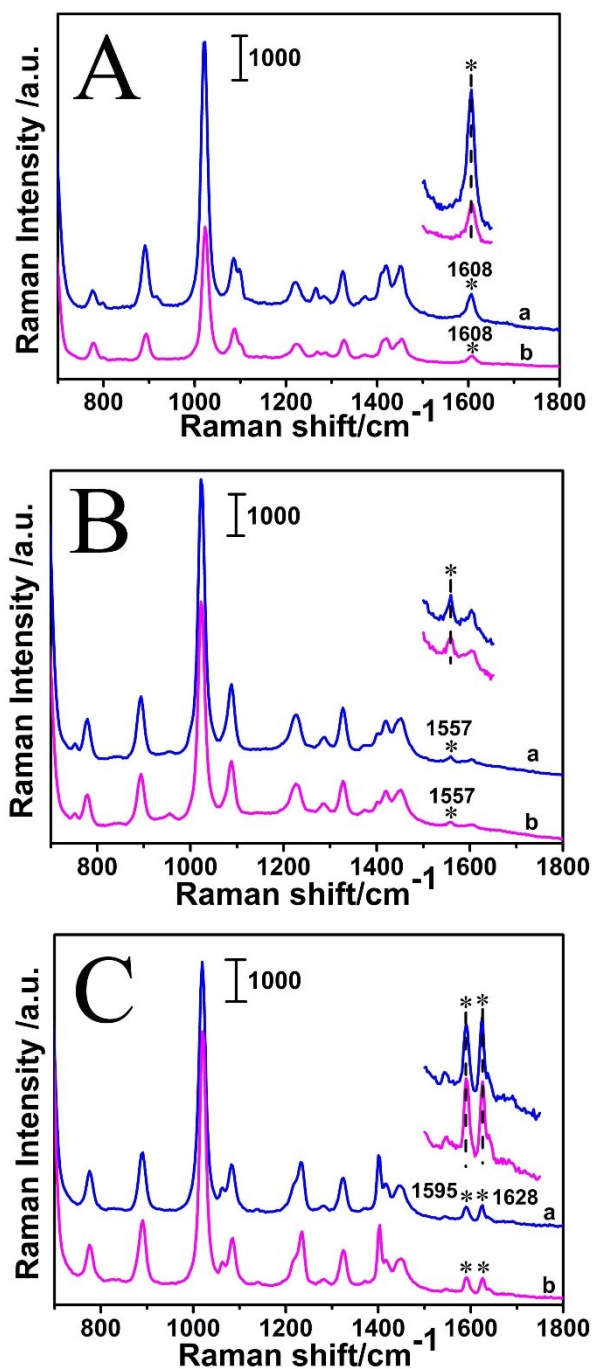

**Fig.S10** SERS spectrum of (A) fluoranthene, (B) anthracene and (C) pyrene by swabbing from the surface of (a) the plastic toy and (b) the rubber toy. (A-C) inset: 5 times amplification of the correlative peak.



15) Fig.S11 Quantitative analysis of pyrene by swabbing from plastic toy.

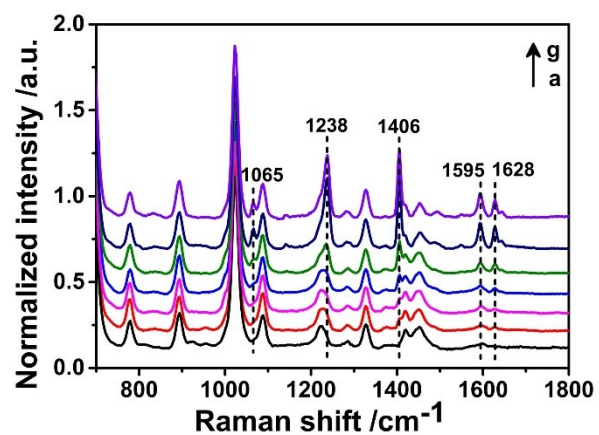

**Fig.S11** Normalized SERS intensity of pyrene by swabbing with PTH-Ag NMs. The concentration of pyrene was (a) 40.45  $\text{ng}\cdot\text{cm}^{-2}$ , (b) 202.3  $\text{ng}\cdot\text{cm}^{-2}$ , (c) 404.5 $\text{ng}\cdot\text{cm}^{-2}$ , (d) 2023  $\text{ng}\cdot\text{cm}^{-2}$ , (e) 4045  $\text{ng}\cdot\text{cm}^{-2}$ , (f) 20225  $\text{ng}\cdot\text{cm}^{-2}$ , (g) 40450  $\text{ng}\cdot\text{cm}^{-2}$ .

16) **Fig.S12** Calibration curve of pyrene based on PTH-Ag NMs by swabbing from plastic toy.

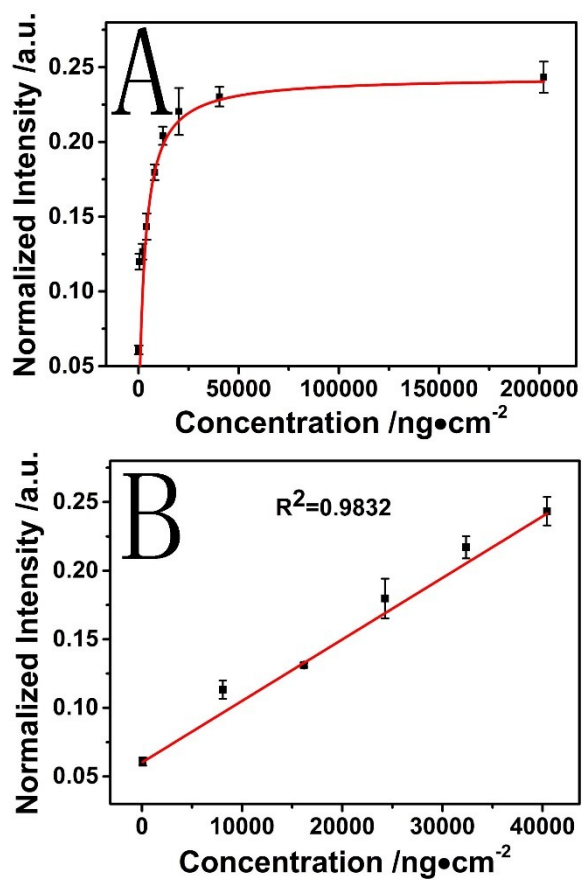

**Fig.S12** Quantitative analysis of pyrene by swabbing from the surface of plastic toy. (A) Calibration curve of pyrene based on PTH-Ag NMs. (B) linear fitting of pyrene. The data points correspond to the average of three times parallel measurements.
